# Supplementary material for: Unlocking Prognostic Genes and Multi-Targeted Therapeutic Bioactives from Herbal Medicines to Combat Cancer-Associated Cachexia: A Transcriptomics and Network Pharmacology Approach
Source: MDPI journal article supplement (doi:10.3390/ijms25010156), 2023-12-21
Supplement: s1 [file s1]

**Table S1.** List of phytochemicals and their canonical SMILES used in this study.

| S. No | Compound Name        | Abbreviation | Canonical SMILES                                                                                                                                                       |
|-------|----------------------|--------------|------------------------------------------------------------------------------------------------------------------------------------------------------------------------|
| 1     | Berberine            | BER          | <chem>COC1=C(C2=C[N+]3=C(C=C2C=C1)C4=CC5=C(C=C4CC3)OCO5)OC</chem>                                                                                                      |
| 2     | Palmatine            | PAL          | <chem>COC1=C(C2=C[N+]3=C(C=C2C=C1)C4=CC(=C(C=C4CC3)OC)OC)OC</chem>                                                                                                     |
| 3     | Coptisine            | COP          | <chem>C1C[N+]2=C(C=C3C=CC4=C(C3=C2)OCO4)C5=CC6=C(C=C51)OCO6</chem>                                                                                                     |
| 4     | Atractylenolide I    | ATA          | <chem>CC1=C2CC3C(=C)CCCC3(C=C2OC1=O)C</chem>                                                                                                                           |
| 5     | Taraxeryl acetate    | TAR          | <chem>CC(=O)OC1CCC2(C(C1(C)C)CCC3(C2CCC4(C3=CCC5(C4CC(CC5)(C)C)C)C)C)C</chem>                                                                                          |
| 6     | Lupeol               | LUP          | <chem>CC(=C)C1CCC2(C1C3CCC4C5(CCC(C(C5CCC4(C3(CC2)C)C)(C)C)O)C)C</chem>                                                                                                |
| 7     | Ginsenosides         | GSN          | <chem>CC(=CCCC(C)(C1CCC2(C1CCC3C2(CCC4C3(CCC(C4(C)C)O)C)C)O)C</chem>                                                                                                   |
| 8     | Ginseng Tetrapeptide | GST          | <chem>CC(C)C(C(=O)NC(CCC(=O)NC(CCCN=C(N)N)C(=O)NCC(=O)O)C(=O)O)N</chem>                                                                                                |
| 9     | Lotusine B           | LTB          | <chem>CCC(C)C1C(=O)NC=CC2=CC=C(C=C2)OC3CCN(C3C(=O)N1)C(=O)C(CC4=CC=CC=C4)NC(=O)C(CC(C)C)N(C)C</chem>                                                                   |
| 10    | Jujubogenin          | JJG          | <chem>CC(=CC1CC(C2C3CCC4C5(CCC(C(C5CCC4(C36CC2(O1)OC6)C)(C)C)O)C)(C)O)C</chem>                                                                                         |
| 11    | Jujuboside A         | JJA          | <chem>CC1C(C(C(C(O1)OC2C(C(COC2OC3CCC4(C5CCC6C7C(CC(OC78CC6(C5(CCC4C3(C)C)C)CO8)C=C(C)C)(C)O)C)O)OC9C(C(C(C(O9)COC1C(C(C(C(O1)CO)O)O)O)O)OC1C(C(C(CO1)O)O)O)O)O</chem> |
| 12    | Coixenolide          | CXL          | <chem>CCCCCCC=CCCCCCCCCCCC(=O)OC(C)C(C)OC(=O)CCCCCCCC=CCCCCCC</chem>                                                                                                   |
| 13    | Betasitosterol       | BST          | <chem>CCC(CCC(C)C1CCC2C1(CCC3C2CC=C4C3(CCC(C4)O)C)C(C)C</chem>                                                                                                         |
| 14    | Caffeic acid         | CFA          | <chem>C1=CC(=C(C=C1C=CC(=O)O)O)O</chem>                                                                                                                                |
| 15    | Naringenin           | NGN          | <chem>C1C(OC2=CC(=CC(=C2C1=O)O)O)C3=CC=C(C=C3)O</chem>                                                                                                                 |
| 16    | Trigonelline         | TGL          | <chem>C[N+]1=CC=CC(=C1)C(=O)[O-]</chem>                                                                                                                                |
| 17    | Gentianine           | GTN          | <chem>C=CC1=CN=CC2=C1CCOC2=O</chem>                                                                                                                                    |
| 18    | Quercetin            | QRC          | <chem>C1=CC(=C(C=C1C2=C(C(=O)C3=C(C=C(C=C3O2)O)O)O)O</chem>                                                                                                            |
| 19    | Gallic acid          | GLA          | <chem>C1=C(C=C(C(=C1O)O)O)C(=O)O</chem>                                                                                                                                |
| 20    | Epicatechin gallate  | ECG          | <chem>C1C(C(OC2=CC(=CC(=C21)O)O)C3=CC(=C(C=C3)O)O)OC(=O)C4=CC(=C(C(=C4)O)O)O</chem>                                                                                    |

|    |                          |     |                                                                                                                                                         |
|----|--------------------------|-----|---------------------------------------------------------------------------------------------------------------------------------------------------------|
| 21 | Kaempferol               | KPF | <chem>C1=CC(=CC=C1C2=C(C(=O)C3=C(C=C(C(=C3O2)O)O)O)O</chem>                                                                                             |
| 22 | 6-Gingerol               | GGL | <chem>CCCCC(CC(=O)CCC1=CC(=C(C=C1)O)OC)O</chem>                                                                                                         |
| 23 | Zingerone                | ZGN | <chem>CC(=O)CCC1=CC(=C(C=C1)O)OC</chem>                                                                                                                 |
| 24 | Citral                   | CTL | <chem>CC(=CCCC(=CC=O)C)C</chem>                                                                                                                         |
| 25 | Beta-Amyrin              | BMR | <chem>CC1(CCC2(CCC3(C(=CCC4C3(CCC5C4(CCC(C5(C)C)O)C)C)C2C1)C)C)C</chem>                                                                                 |
| 26 | 7,8-dimethoxycoumarin    | DMC | <chem>COC1=C(C2=C(C=C1)C=CC(=O)O2)OC</chem>                                                                                                             |
| 27 | Xanthosin                | XNS | <chem>CC1CC2C(CC=C1CCC(=O)C)C(=C)C(=O)O2</chem>                                                                                                         |
| 28 | Xanthanol                | XNL | <chem>C1=CC=C2C(=C1)C(C3=CC=CC=C3O2)O</chem>                                                                                                            |
| 29 | Apigetrin                | AGT | <chem>C1=CC(=CC=C1C2=CC(=O)C3=C(C=C(C(=C3O2)OC4C(C(C(C(O4)CO)O)O)O)O)O</chem>                                                                           |
| 30 | Astragaloside            | AGS | <chem>COC1=C(C=CC(=C1)C2=C(C(=O)C3=C(C=C(C(=C3O2)O)O)OC4C(C(C(C(O4)COC5C(C(C(C(O5)CO)O)O)O)O)O)O)O</chem>                                               |
| 31 | Chlorogenic acid         | CGA | <chem>C1C(C(C(CC1(C(=O)O)O)OC(=O)C=CC2=CC(=C(C=C2)O)O)O)O</chem>                                                                                        |
| 32 | Kaemferol-3-O-rutinoside | KFR | <chem>CC1C(C(C(C(O1)OCC2C(C(C(C(O2)OC3=C(OC4=CC(=CC(=C4C3=O)O)O)C5=CC=C(C=C5)O)O)O)O)O)O</chem>                                                         |
| 33 | Carthamin                | CRN | <chem>C1=CC(=CC=C1C=CC(=O)C2=C(C(C(=C(C2=O)C=C3C(=O)C(=C(C(C3=O)(C4C(C(C(C(O4)CO)O)O)O)O)O)C(=O)C=CC5=CC=C(C=C5)O)O)(C6C(C(C(C(O6)CO)O)O)O)O)O)O</chem> |
| 34 | Hydroxysafflor yellow A  | HYA | <chem>C1=CC(=CC=C1C=CC(=C2C(=C(C(=O)C(C2=O)(C3C(C(C(C(O3)CO)O)O)O)O)C4C(C(C(C(O4)CO)O)O)O)O)O</chem>                                                    |

**Table S2.** KEGG pathway enrichment analysis of unique genes and their involvement in CAC-related metabolic pathways.

| Pathway.ID | Pathway Description                     | p.Val       | FDR         | Genes                                                              |
|------------|-----------------------------------------|-------------|-------------|--------------------------------------------------------------------|
| KEGG:05417 | Lipid and atherosclerosis               | 5.04E-10    | 5.04E-10    | IKBKB,STAT3,MMP9,PPARG,GSK3B,NLRP3,TLR4,RELA,TNF,EIF2AK3,TP53,SELP |
| KEGG:04210 | Apoptosis                               | 1.85735E-06 | 1.85735E-06 | IKBKB,CAPN1,BIRC3,MAP3K14,RELA,TNF,EIF2AK3,TP53                    |
| KEGG:05142 | Chagas disease                          | 5.29392E-06 | 5.29392E-06 | IKBKB,NOS2,ACE,TLR4,RELA,SERPINE1,TNF                              |
| KEGG:05171 | Coronavirus disease - COVID-19          | 8.32947E-06 | 8.32947E-06 | IKBKB,STAT3,F2,ACE,NLRP3,TLR4,RELA,TNF,SELP                        |
| KEGG:05145 | Toxoplasmosis                           | 8.98276E-06 | 8.98276E-06 | IKBKB,STAT3,NOS2,BIRC3,TLR4,RELA,TNF                               |
| KEGG:05162 | Measles                                 | 4.75766E-05 | 4.75766E-05 | IKBKB,STAT3,GSK3B,TLR4,RELA,EIF2AK3,TP53                           |
| KEGG:04936 | Alcoholic liver disease                 | 5.49983E-05 | 5.49983E-05 | IKBKB,GSK3B,SIRT1,MAP3K14,TLR4,RELA,TNF                            |
| KEGG:05160 | Hepatitis C                             | 0.00010839  | 0.00010839  | IKBKB,STAT3,GSK3B,RELA,TNF,EIF2AK3,TP53                            |
| KEGG:05161 | Hepatitis B                             | 0.000128361 | 0.000128361 | IKBKB,STAT3,MMP9,TLR4,RELA,TNF,TP53                                |
| KEGG:04064 | NF-kappa B signaling pathway            | 0.000133846 | 0.000133846 | IKBKB,BIRC3,MAP3K14,TLR4,RELA,TNF                                  |
| KEGG:05131 | Shigellosis                             | 0.000187411 | 0.000187411 | IKBKB,GSK3B,CAPN1,NLRP3,TLR4,RELA,TNF,TP53                         |
| KEGG:04668 | TNF signaling pathway                   | 0.000243938 | 0.000243938 | IKBKB,MMP9,BIRC3,MAP3K14,RELA,TNF                                  |
| KEGG:05202 | Transcriptional misregulation in cancer | 0.000414985 | 0.000414985 | MMP9,PPARG,BIRC3,NGFR,RELA,IGFBP3,TP53                             |
| KEGG:05130 | Pathogenic Escherichia coli infection   | 0.000475524 | 0.000475524 | IKBKB,TUBB3,F2,NLRP3,TLR4,RELA,TNF                                 |
| KEGG:05133 | Pertussis                               | 0.000614228 | 0.000614228 | NOS2,NLRP3,TLR4,RELA,TNF                                           |
| KEGG:05135 | Yersinia infection                      | 0.000713926 | 0.000713926 | IKBKB,GSK3B,NLRP3,TLR4,RELA,TNF                                    |
| KEGG:05200 | Pathways in cancer                      | 0.001097739 | 0.001097739 | IKBKB,STAT3,MMP9,PPARG,F2,NOS2,GSK3B,BIRC3,RELA,TP53               |
| KEGG:04932 | Non-alcoholic fatty liver disease       | 0.001454047 | 0.001454047 | IKBKB,PPARG,GSK3B,RELA,TNF,EIF2AK3                                 |
| KEGG:04657 | IL-17 signaling pathway                 | 0.001485521 | 0.001485521 | IKBKB,MMP9,GSK3B,RELA,TNF                                          |
| KEGG:04218 | Cellular senescence                     | 0.001564786 | 0.001564786 | CAPN1,SIRT1,RELA,SERPINE1,IGFBP3,TP53                              |
| KEGG:05222 | Small cell lung cancer                  | 0.001566713 | 0.001566713 | IKBKB,NOS2,BIRC3,RELA,TP53                                         |
| KEGG:04217 | Necroptosis                             | 0.001743585 | 0.001743585 | STAT3,CAPN1,BIRC3,NLRP3,TLR4,TNF                                   |
| KEGG:05215 | Prostate cancer                         | 0.002025969 | 0.002025969 | IKBKB,MMP9,GSK3B,RELA,TP53                                         |
| KEGG:05132 | Salmonella infection                    | 0.002262994 | 0.002262994 | IKBKB,TUBB3,BIRC3,NLRP3,TLR4,RELA,TNF                              |
| KEGG:05164 | Influenza A                             | 0.002381209 | 0.002381209 | IKBKB,NLRP3,TLR4,RELA,TNF,PLG                                      |
| KEGG:04660 | T cell receptor signaling pathway       | 0.002708325 | 0.002708325 | IKBKB,GSK3B,MAP3K14,RELA,TNF                                       |

|            |                                                        |             |             |                                               |
|------------|--------------------------------------------------------|-------------|-------------|-----------------------------------------------|
| KEGG:04625 | C-type lectin receptor signaling pathway               | 0.002837532 | 0.002837532 | IKBKB,MAP3K14,NLRP3,RELA,TNF                  |
| KEGG:04931 | Insulin resistance                                     | 0.003402919 | 0.003402919 | IKBKB,STAT3,GSK3B,RELA,TNF                    |
| KEGG:04066 | HIF-1 signaling pathway                                | 0.003557021 | 0.003557021 | STAT3,NOS2,TLR4,RELA,SERPINE1                 |
| KEGG:04621 | NOD-like receptor signaling pathway                    | 0.003734966 | 0.003734966 | IKBKB,BIRC3,NLRP3,TLR4,RELA,TNF               |
| KEGG:05010 | Alzheimer disease                                      | 0.004654905 | 0.004654905 | IKBKB,TUBB3,NOS2,GSK3B,CAPN1,RELA,TNF,EIF2AK3 |
| KEGG:04722 | Neurotrophin signaling pathway                         | 0.005200676 | 0.005200676 | IKBKB,GSK3B,NGFR,RELA,TP53                    |
| KEGG:05321 | Inflammatory bowel disease                             | 0.005804451 | 0.005804451 | STAT3,TLR4,RELA,TNF                           |
| KEGG:05169 | Epstein-Barr virus infection                           | 0.005975193 | 0.005975193 | IKBKB,STAT3,MAP3K14,RELA,TNF,TP53             |
| KEGG:04380 | Osteoclast differentiation                             | 0.006842309 | 0.006842309 | IKBKB,PPARG,MAP3K14,RELA,TNF                  |
| KEGG:04920 | Adipocytokine signaling pathway                        | 0.008829943 | 0.008829943 | IKBKB,STAT3,RELA,TNF                          |
| KEGG:05140 | Leishmaniasis                                          | 0.010424787 | 0.010424787 | NOS2,TLR4,RELA,TNF                            |
| KEGG:05418 | Fluid shear stress and atherosclerosis                 | 0.010922754 | 0.010922754 | IKBKB,MMP9,RELA,TNF,TP53                      |
| KEGG:05163 | Human cytomegalovirus infection                        | 0.011510504 | 0.011510504 | IKBKB,STAT3,GSK3B,RELA,TNF,TP53               |
| KEGG:05212 | Pancreatic cancer                                      | 0.012863415 | 0.012863415 | IKBKB,STAT3,RELA,TP53                         |
| KEGG:01523 | Antifolate resistance                                  | 0.013389849 | 0.013389849 | IKBKB,RELA,TNF                                |
| KEGG:04211 | Longevity regulating pathway                           | 0.023651662 | 0.023651662 | PPARG,SIRT1,RELA,TP53                         |
| KEGG:05235 | PD-L1 expression and PD-1 checkpoint pathway in cancer | 0.023651662 | 0.023651662 | IKBKB,STAT3,TLR4,RELA                         |
| KEGG:04933 | AGE-RAGE signaling pathway in diabetic complications   | 0.036893696 | 0.036893696 | STAT3,RELA,SERPINE1,TNF                       |
| KEGG:05146 | Amoebiasis                                             | 0.038313492 | 0.038313492 | NOS2,TLR4,RELA,TNF                            |
| KEGG:04620 | Toll-like receptor signaling pathway                   | 0.03977185  | 0.03977185  | IKBKB,TLR4,RELA,TNF                           |
| KEGG:04062 | Chemokine signaling pathway                            | 0.047993483 | 0.047993483 | IKBKB,STAT3,CCR2,GSK3B,RELA                   |

**Table S3.** List of cachexia-related genes used in this study.

| S. No | Gene    | Reference            |
|-------|---------|----------------------|
| 1     | mTORC1  | Setiawan et al. 2023 |
| 2     | mTORC2  |                      |
| 3     | MYOD1   |                      |
| 4     | UCP1    |                      |
| 5     | IGF1    |                      |
| 6     | AKT     |                      |
| 7     | JUP     |                      |
| 8     | BMP     |                      |
| 9     | BMP7    |                      |
| 10    | MSTN    |                      |
| 11    | ACVR1   |                      |
| 12    | SMAD2   |                      |
| 13    | SMAD3   |                      |
| 14    | NFKB1   |                      |
| 15    | MAP3K14 |                      |
| 16    | TNF     |                      |
| 17    | STAT3   |                      |
| 18    | IL6     |                      |
| 19    | BNIP3   |                      |
| 20    | LC3B    |                      |
| 21    | FOXO3   |                      |
| 22    | ATG7    |                      |
| 23    | PI3K    |                      |
| 24    | CAPN1   |                      |
| 25    | KCTD7   |                      |
| 26    | PIF     |                      |

|    |           |                        |
|----|-----------|------------------------|
| 27 | TRIM63    | Narasimhan et al. 2021 |
| 28 | SLC39A4   |                        |
| 29 | PDK4      |                        |
| 30 | SDF1      |                        |
| 31 | CEBPA     |                        |
| 32 | CXCR4     |                        |
| 33 | EIF2AK3   |                        |
| 34 | COL1A1    |                        |
| 35 | HMGCS2    |                        |
| 36 | COL3A1    |                        |
| 37 | ASPN      |                        |
| 38 | DDN       |                        |
| 39 | TMEM8C    |                        |
| 40 | CHI3L1    |                        |
| 41 | LOC653513 |                        |
| 42 | MXRA5     |                        |
| 43 | SAA2      |                        |
| 44 | THY1      |                        |
| 45 | CPXM1     |                        |
| 46 | HP        |                        |
| 47 | SFRP4     |                        |
| 48 | SLC5A1    |                        |
| 49 | MMP9      |                        |
| 50 | TYRP1     |                        |
| 51 | NOV       |                        |
| 52 | COL1A2    |                        |
| 53 | ECEL1     |                        |
| 54 | KRT80     |                        |
| 55 | CCL19     |                        |

|    |          |
|----|----------|
| 56 | COL5A1   |
| 57 | SFRP2    |
| 58 | SERPINE1 |
| 59 | FZD10    |
| 60 | GLT1D1   |
| 61 | CRABP2   |
| 62 | STMN2    |
| 63 | CCL3     |
| 64 | TPPP3    |
| 65 | TMEM119  |
| 66 | LUM      |
| 67 | FXYP4    |
| 68 | SPON1    |
| 69 | TNC      |
| 70 | ELN      |
| 71 | SLAMF8   |
| 72 | CILP2    |
| 73 | CCL13    |
| 74 | CCDC80   |
| 75 | OGN      |
| 76 | MOXD1    |
| 77 | CD69     |
| 78 | ERBB3    |
| 79 | LGI2     |
| 80 | IGJ      |
| 81 | CAMSAP3  |
| 82 | CKB      |
| 83 | COL5A2   |
| 84 | MSMP     |

|     |          |
|-----|----------|
| 85  | TTC39A   |
| 86  | MGC39372 |
| 87  | C2       |
| 88  | CD163L1  |
| 89  | ZNF556   |
| 90  | CELSR1   |
| 91  | BHLHE22  |
| 92  | MYH3     |
| 93  | CTHRC1   |
| 94  | TUBB3    |
| 95  | KAZALD1  |
| 96  | IGLL5    |
| 97  | ESM1     |
| 98  | MYBPH    |
| 99  | COL14A1  |
| 100 | TNFAIP6  |
| 101 | FAIM2    |
| 102 | PHOSPHO1 |
| 103 | VASH2    |
| 104 | SMIM5    |
| 105 | CH25H    |
| 106 | GDF10    |
| 107 | CERCAM   |
| 108 | FNDC1    |
| 109 | CD200R1  |
| 110 | CYS1     |
| 111 | SHANK1   |
| 112 | MYL5     |
| 113 | CRISPLD1 |



|     |          |
|-----|----------|
| 114 | FAM180B  |
| 115 | CRMP1    |
| 116 | PDE6G    |
| 117 | LTK      |
| 118 | GADD45G  |
| 119 | ABLIM1   |
| 120 | TNFRSF18 |
| 121 | NLRP3    |
| 122 | ARHGDIG  |
| 123 | CASKIN1  |
| 124 | IGSF10   |
| 125 | SIGLEC9  |
| 126 | THBS4    |
| 127 | ADAMTS2  |
| 128 | EMB      |
| 129 | RASD1    |
| 130 | MMP11    |
| 131 | LBP      |
| 132 | ITGB8    |
| 133 | LRRC17   |
| 134 | FPR3     |
| 135 | NGFR     |
| 136 | PRG4     |
| 137 | CCR2     |
| 138 | INHBE    |
| 139 | ABCC6    |
| 140 | SLC45A3  |
| 141 | OXCT2    |
| 142 | FZD2     |

|     |            |
|-----|------------|
| 143 | FAM57B     |
| 144 | IL4I1      |
| 145 | IL7R       |
| 146 | CCL4       |
| 147 | HSD11B2    |
| 148 | RHOH       |
| 149 | TNFAIP8L3  |
| 150 | PMAIP1     |
| 151 | LILRB4     |
| 152 | PNMA2      |
| 153 | PITPNM1    |
| 154 | KDEL3      |
| 155 | GPR183     |
| 156 | DIO2       |
| 157 | TMEM59L    |
| 158 | CCL2       |
| 159 | GNA15      |
| 160 | SOX3       |
| 161 | CILP       |
| 162 | BRSK1      |
| 163 | PRUNE2     |
| 164 | QPCT       |
| 165 | CYP4F11    |
| 166 | IFITM10    |
| 167 | CERKL      |
| 168 | ST6GALNAC2 |
| 169 | FOXI2      |
| 170 | BICD1      |
| 171 | ASPHD2     |

|     |         |                 |
|-----|---------|-----------------|
| 172 | ABO     |                 |
| 173 | SVOP    |                 |
| 174 | OSM     |                 |
| 175 | VCAN    |                 |
| 176 | OMD     |                 |
| 177 | SOCS3   |                 |
| 178 | TNFRSF9 |                 |
| 179 | MYLK    |                 |
| 180 | PAPLN   |                 |
| 181 | VIPR2   |                 |
| 182 | ITGA11  |                 |
| 183 | SELP    | Tan et al. 2011 |
| 184 | LTA     |                 |
| 185 | IL-1B   |                 |
| 186 | ACE     |                 |
| 187 | LPL     |                 |
| 188 | RETN    |                 |
| 189 | ADIPOQ  |                 |
| 190 | Akt     |                 |
| 192 | Ap1     |                 |
| 193 | ERK1    |                 |
| 194 | ERK2    |                 |
| 195 | IFNG    |                 |
| 196 | IGFBP3  |                 |
| 197 | IgG     |                 |
| 198 | IL12    |                 |
| 199 | LDL     |                 |
| 200 | LEP     |                 |
| 201 | Mapk    |                 |

|     |        |
|-----|--------|
| 202 | NFkB   |
| 204 | MAPK   |
| 205 | PDGFB  |
| 206 | PPARG  |
| 207 | Sod    |
| 208 | TLR2   |
| 209 | TLR4   |
| 210 | Vegf   |
| 211 | ADRB2  |
| 212 | BIRC3  |
| 213 | BTG2   |
| 214 | CAMP   |
| 215 | CREBBP |
| 216 | CRP    |
| 217 | CSF1   |
| 218 | F2     |
| 219 | GSK3B  |
| 220 | HDAC3  |
| 221 | HGF    |
| 222 | HMGB1  |
| 223 | HSPD1  |
| 224 | IKBKB  |
| 225 | IL17A  |
| 226 | IL6R   |
| 227 | IRS1   |
| 228 | LTF    |
| 229 | NFIC   |
| 230 | NOS2   |
| 231 | NR3C1  |

|     |         |  |
|-----|---------|--|
| 232 | PLD1    |  |
| 233 | PLG     |  |
| 234 | RELA    |  |
| 235 | SIRT1   |  |
| 236 | TNFSF12 |  |
| 237 | TP53    |  |
| 238 | TSC22D3 |  |
